# Supplementary material for: Mitochondrial genomes of the headstanders Megaleporinus muyscorum (Steindachner 1900) and Megaleporinus obtusidens (Valenciennes 1837), (Characiformes, Anostomidae)
Source: Mitochondrial DNA B Resour. 2018 May 23;3(2):634–6. doi: 10.1080/23802359.2018.1473723 (PMC7800840; doi:10.1080/23802359.2018.1473723)
Supplement: R_AppendixS1.xlsx [file TMDN_A_1473723_SM1133.xlsx]

## Sheet: Sheet1
Institution	Tissue number	family	genus	Appendix S1. Table of Megaleporinus muyscorum and Megaleporinus obtusidens samples used in the current study, including: locality, tissue numbers, and data availability.
Univesidad del Tolima	CZUT-IC-TE70	Anostomidae	Leporinus
Univesidad del Tolima	CZUT-IC-TE348	Anostomidae	Leporinus	species	Locality	latitude	longitude	State	Country	Region
Univesidad del Tolima	CZUT-IC-TE349	Anostomidae	Leporinus	Megaleporinus muyscorum	Tumarado marsh, Atrato basin, La PrimeraTiene marsh, Unguia, Antioquia, Colombia	7°48'2"N	77°3'34.7"W	Antioquia	Colombia	Atrato
Pontificia Universidad Javeriana	JAM2353	Anostomidae	Leporinus	Megaleporinus muyscorum	Tumarado marsh, Atrato basin, La PrimeraTiene marsh, Unguia, Antioquia, Colombia	7°48'2"N	77°3'34.7"W	Antioquia	Colombia	Atrato
Pontificia Universidad Javeriana	JAM2354	Anostomidae	Leporinus	Megaleporinus muyscorum	Tumarado marsh, Atrato basin, La PrimeraTiene marsh, Unguia, Antioquia, Colombia	7°48'2"N	77°3'34.7"W	Antioquia	Colombia	Atrato
Universidad Nacional de Colombia -Medellin-	UNM-73758	Anostomidae	Leporinus	Megaleporinus muyscorum	Tumarado marsh, Atrato basin, La PrimeraTiene marsh, Unguia, Antioquia, Colombia	7°48'2"N	77°3'34.7"W	Antioquia	Colombia	Atrato
Universidad Nacional de Colombia -Medellin-	UNM-29360	Anostomidae	Leporinus	Megaleporinus muyscorum	Tumarado marsh, Atrato basin, La PrimeraTiene marsh, Unguia, Antioquia, Colombia	7°48'2"N	77°3'34.7"W	Antioquia	Colombia	Atrato
Universidad Nacional de Colombia -Medellin-	UNM-29881	Anostomidae	Leporinus	Megaleporinus muyscorum	Cauca river, Santafe de Antioquia, Antioquia, Colombia	6°30'51.95"N	75°49'4.49"W	Antioquia	Colombia	Cauca
Universidad Nacional de Colombia -Medellin-	UNM-53685	Anostomidae	Leporinus	Megaleporinus muyscorum	Cauca river, Caceres, Antioquia, Colombia	7°34'56.93"N	75°20'56.20"W	Antioquia	Colombia	Cauca
Universidad Nacional de Colombia -Medellin-	UNM-73734	Anostomidae	Leporinus	Megaleporinus muyscorum	Cauca river, Nechi, Antioquia, Colombia	8°5'44.52"N	74°45'59.06"W	Antioquia	Colombia	Cauca
Pontificia Universidad Javeriana	JAM2285	Anostomidae	Leporinus	Megaleporinus muyscorum	Cauca river, "Cienaga Grande", Montecristo, Bolivar, Colombia	8°17'46.45"S	74°30'4.9284"W	Bolivar	Colombia	Cauca
Pontificia Universidad Javeriana	JAM2308	Anostomidae	Leporinus	Megaleporinus muyscorum	Cauca river, Punta Cartagena, Magangue, Bolivar, Colombia	8°53'36.58"N	74°28'29.96"W	Bolivar	Colombia	Cauca
Pontificia Universidad Javeriana	JAM2309	Anostomidae	Leporinus	Megaleporinus muyscorum	Anchique river, Magdalena basin, Tolima, Colombia	3°34'24.7"N	75°0.5'59.1"W	Tolima	Colombia	Magdalena
Pontificia Universidad Javeriana	JAM2310	Anostomidae	Leporinus	Megaleporinus muyscorum	Magdalena river, Honda, Caracoli, Tolima, Colombia	5°15'0"N	74°50'0"W	Tolima	Colombia	Magdalena
Pontificia Universidad Javeriana	JAM2311	Anostomidae	Leporinus	Megaleporinus muyscorum	Magdalena river, Honda, Caracoli, Tolima, Colombia	5°15'0"N	74°50'0"W	Tolima	Colombia	Magdalena
Pontificia Universidad Javeriana	JAM2411	Anostomidae	Leporinus	Megaleporinus muyscorum	Magdalena river, Honda, Caracoli, Tolima, Colombia	5°15'0"N	74°50'0"W	Tolima	Colombia	Magdalena
Pontificia Universidad Javeriana	JAM2412	Anostomidae	Leporinus	Megaleporinus muyscorum	Magdalena river, Honda, Caracoli, Tolima, Colombia	5°15'0"N	74°50'0"W	Tolima	Colombia	Magdalena
Pontificia Universidad Javeriana	JAM2413	Anostomidae	Leporinus	Megaleporinus muyscorum	San Jorge river, San Marcos, Sucre, Colombia	8°39'20.18"N	75°5'39.35"W	Sucre	Colombia	San Jorge
Pontificia Universidad Javeriana	JAM2414	Anostomidae	Leporinus	Megaleporinus muyscorum	San Jorge river, San Marcos, Sucre, Colombia	8°39'20.18"N	75°5'39.35"W	Sucre	Colombia	San Jorge
Pontificia Universidad Javeriana	JAM2323	Anostomidae	Leporinus	Megaleporinus muyscorum	San Jorge river, San Marcos, Sucre, Colombia	8°39'20.18"N	75°5'39.35"W	Sucre	Colombia	San Jorge
Pontificia Universidad Javeriana	JAM2355	Anostomidae	Leporinus	Megaleporinus muyscorum	San Jorge river, San Marcos, Sucre, Colombia	8°39'20.18"N	75°5'39.35"W	Sucre	Colombia	San Jorge
Pontificia Universidad Javeriana	JAM2356	Anostomidae	Leporinus	Megaleporinus muyscorum	San Jorge river, San Marcos, Sucre, Colombia	8°39'20.18"N	75°5'39.35"W	Sucre	Colombia	San Jorge
Pontificia Universidad Javeriana	JAM2357	Anostomidae	Leporinus	Megaleporinus muyscorum	Sinu river, Urra dam, Cordoba, Colombia	7°54'31.6"N	76°10'21.6"W	Córdoba	Colombia	Sinu
Pontificia Universidad Javeriana	JAM2358	Anostomidae	Leporinus	Megaleporinus muyscorum	Sinu river, Urra dam, Cordoba, Colombia	7°54'31.6"N	76°10'21.6"W	Córdoba	Colombia	Sinú
Pontificia Universidad Javeriana	JAM2359	Anostomidae	Leporinus	Megaleporinus muyscorum	Sinu river, Urra dam, Cordoba, Colombia	7°54'31.6"N	76°10'21.6"W	Córdoba	Colombia	Sinú
Smithsonian Tropical Research Institute	STRI-2487	Anostomidae	Leporinus	Megaleporinus muyscorum	Sinu river, Urra dam, Cordoba, Colombia	7°54'31.6"N	76°10'21.6"W	Córdoba	Colombia	Sinú
				Megaleporinus muyscorum	Sinu river, Urra dam, Cordoba, Colombia	7°54'31.6"N	76°10'21.6"W	Córdoba	Colombia	Sinú
				Megaleporinus obtusidens	Iguazu river, Iguazu, Argentina	25°38'44.9"S	54°27'41.0"W	Iguazu National Park	Argentina	Iguazu
